# Supplementary material
Source: PubMed Central journal article supplement (PMC2409006)
Supplement: pp.107.110247_4.pdf [file pp.107.110247_4.pdf]

## Supplementary material:

### Figure 1

Alignment of predicted Abc1 proteins related to AtOSA1: *Arabidopsis*, AtOSA1 (NP\_201299), *Oryza*, (Os02g0575500), *Oryza*, (Os09g0250700), *Nostoc* NP\_488555 Nos (NP\_488555), *Synechocystis*, P73627 Syn (P73627), *Arabidopsis*, ABC1 A.th. (CAA16542), and *Saccharomyces cerevisiae*, ABC1 S. cerev. (CAA41759). Conserved amino acids within the Abc1 domain are indicated with an asterisk. Chloroplast targeting pre-sequences within AtOSA1 proteins as predicted with TargetP are presented in bold. Putative trans-membrane spans are presented in bold italic. The Abc1 region is underlined in AtOSA1.

### Figure 2

*AtOSA1* T-DNA insertion mutants. (A) Schematic representation of the T-DNA insertion sites in *atosal-1* (SALK 045739) and *atosal-2* (GABI 132G06). For PCR screening of homozygote lines, combinations of DNAg left and right border primers and a T-DNA left border primer were used.

### Figure 3

Verification of a truncated transcript in *atosal-1* (SALK 045739) and *atosal-2* (GABI 132G06). We have designed 3 sets of primers in different position of the transcript. A transcript could be only detected with primers 1 (close to the 5' end).
