# Supplementary material
Source: PubMed Central journal article supplement (PMC2409006)

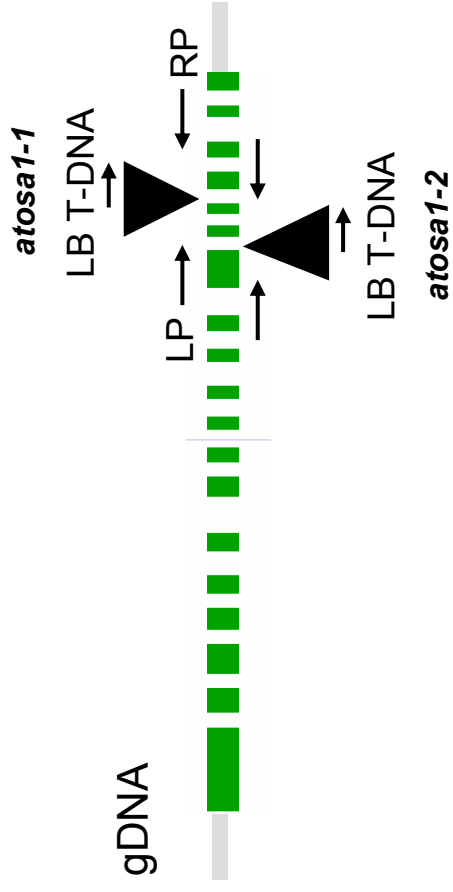

**A**

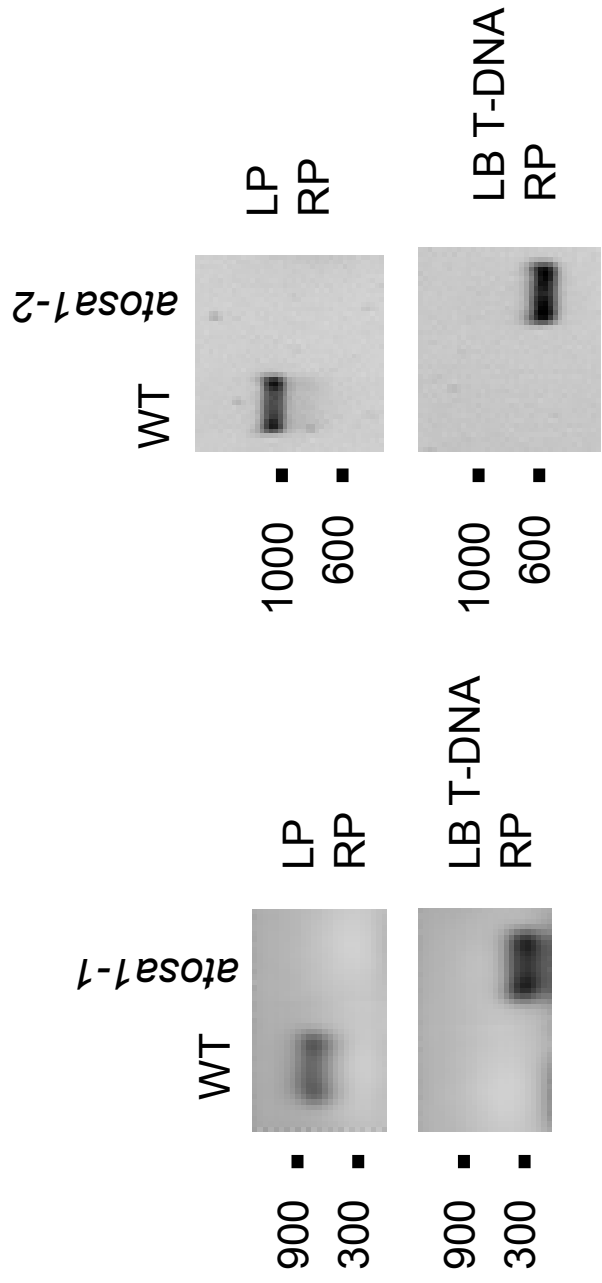

**B**

Supplement: pp.107.110247_2.pdf [file pp.107.110247_2.pdf]

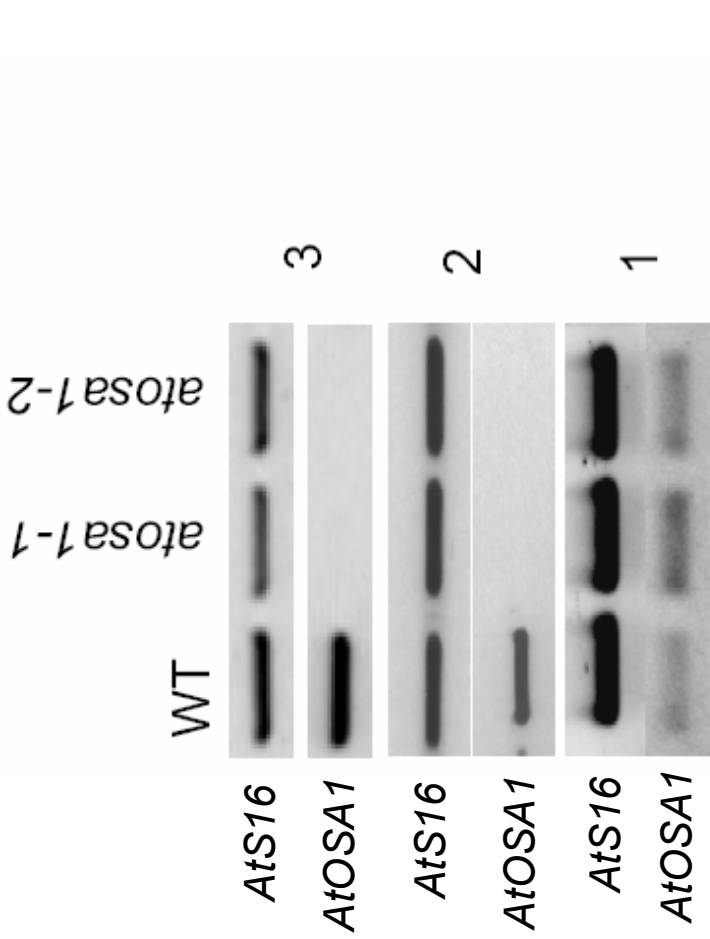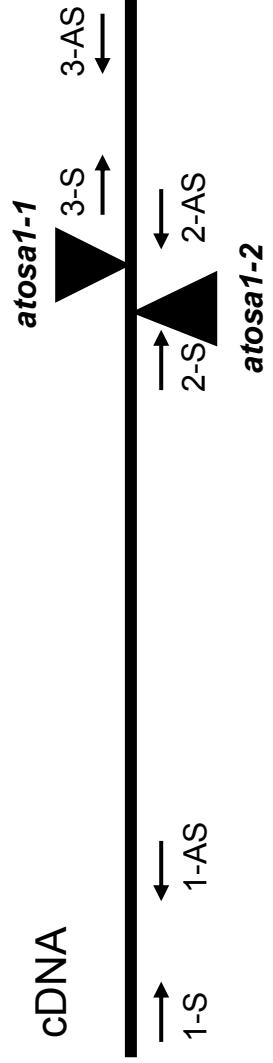

Supplement: pp.107.110247_3.pdf [file pp.107.110247_3.pdf]
